# Supplementary material
Source: PubMed Central journal article supplement (PMC3094175)

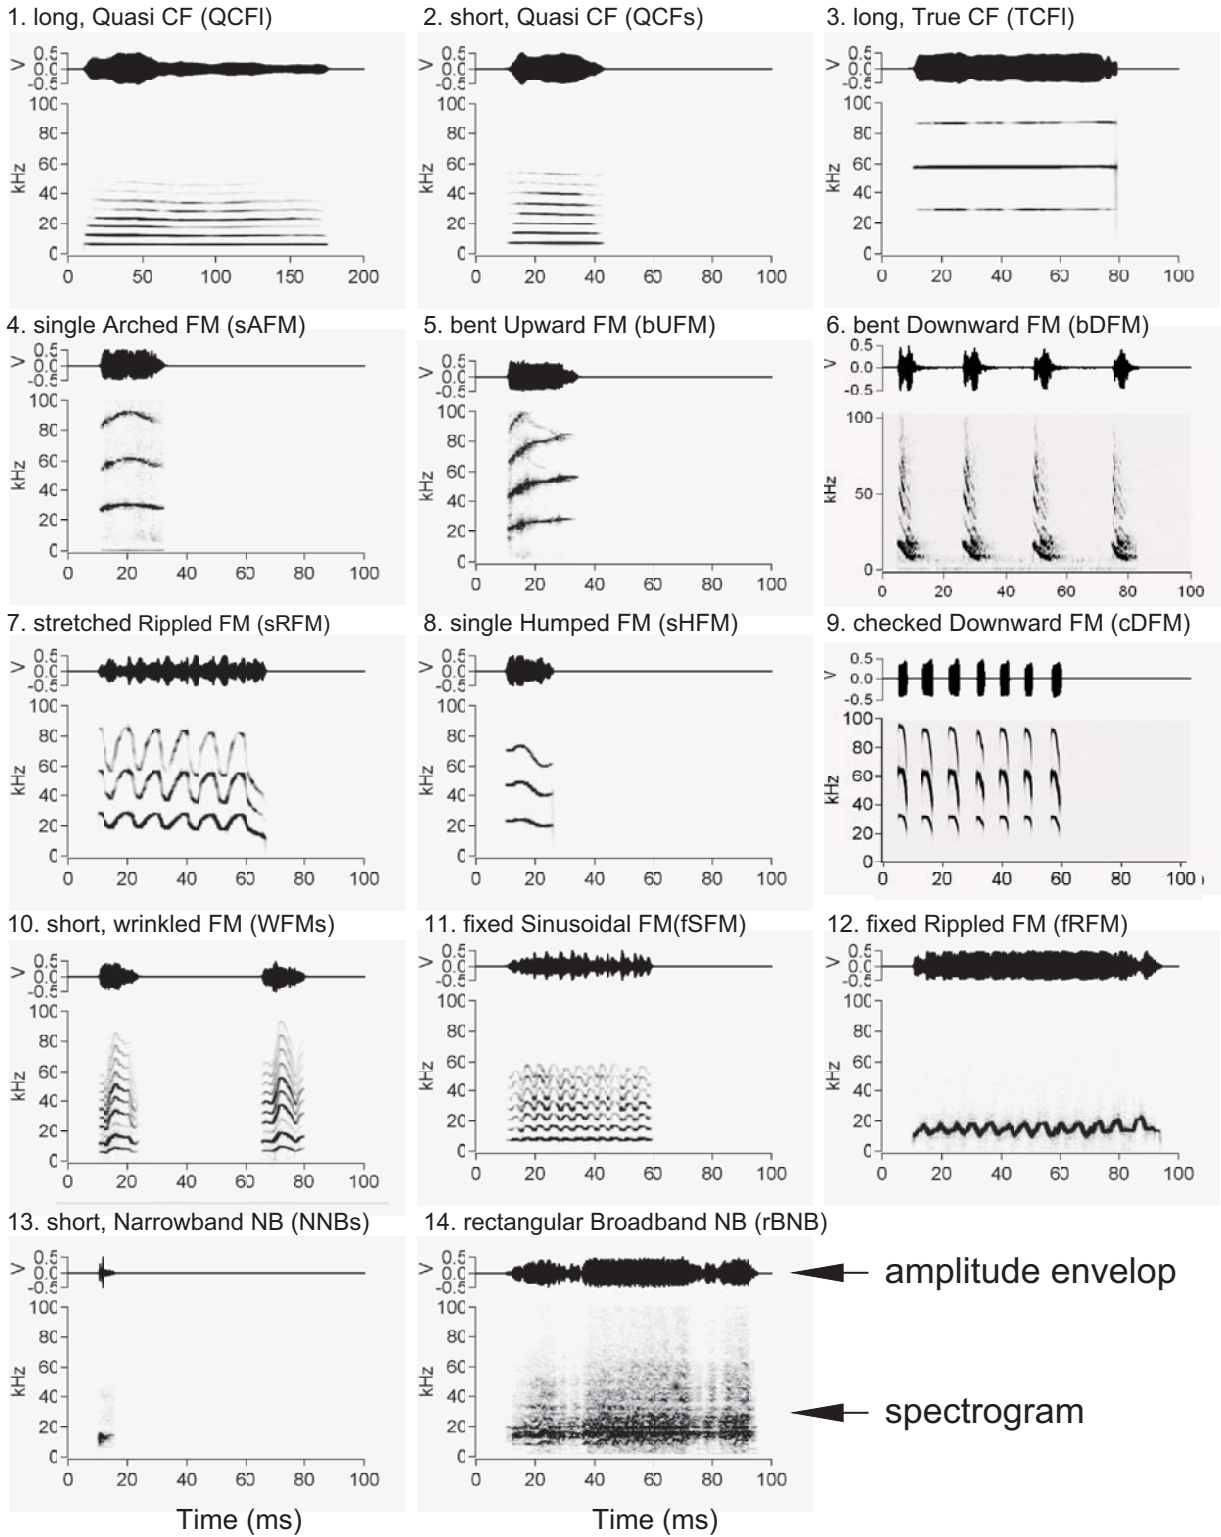

Supplement: supp_00580.2010_figS1.pdf [file supp_00580.2010_figS1.pdf]

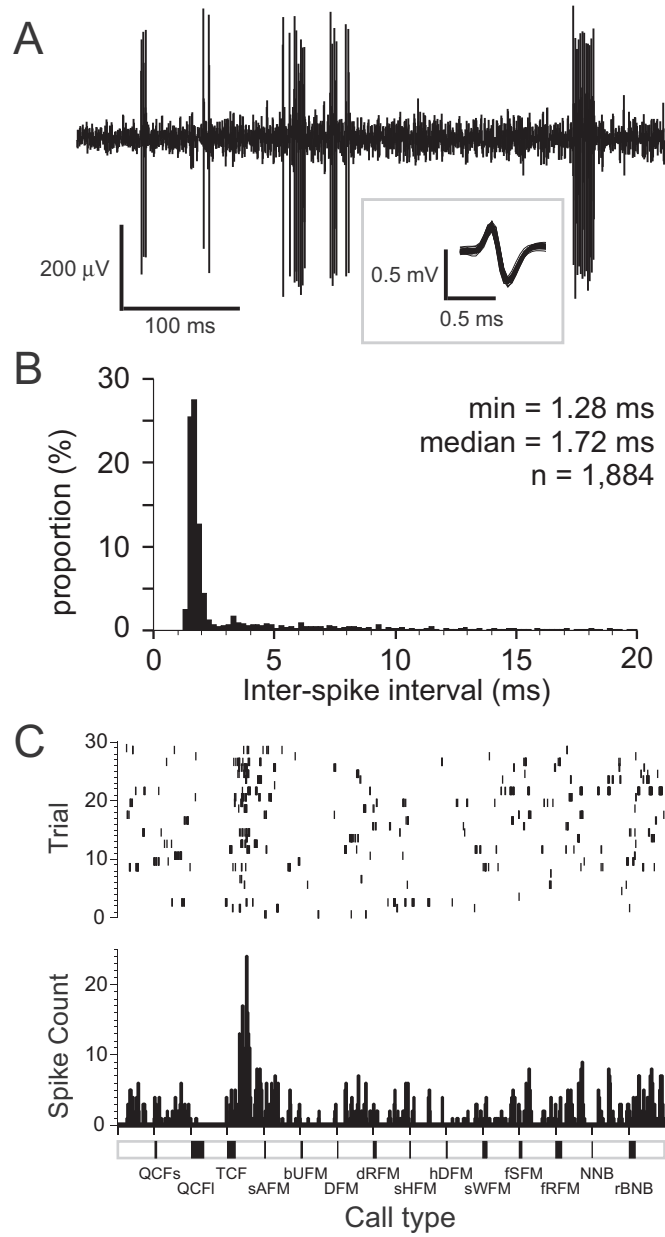

Supplement: supp_00580.2010_figS2.pdf [file supp_00580.2010_figS2.pdf]

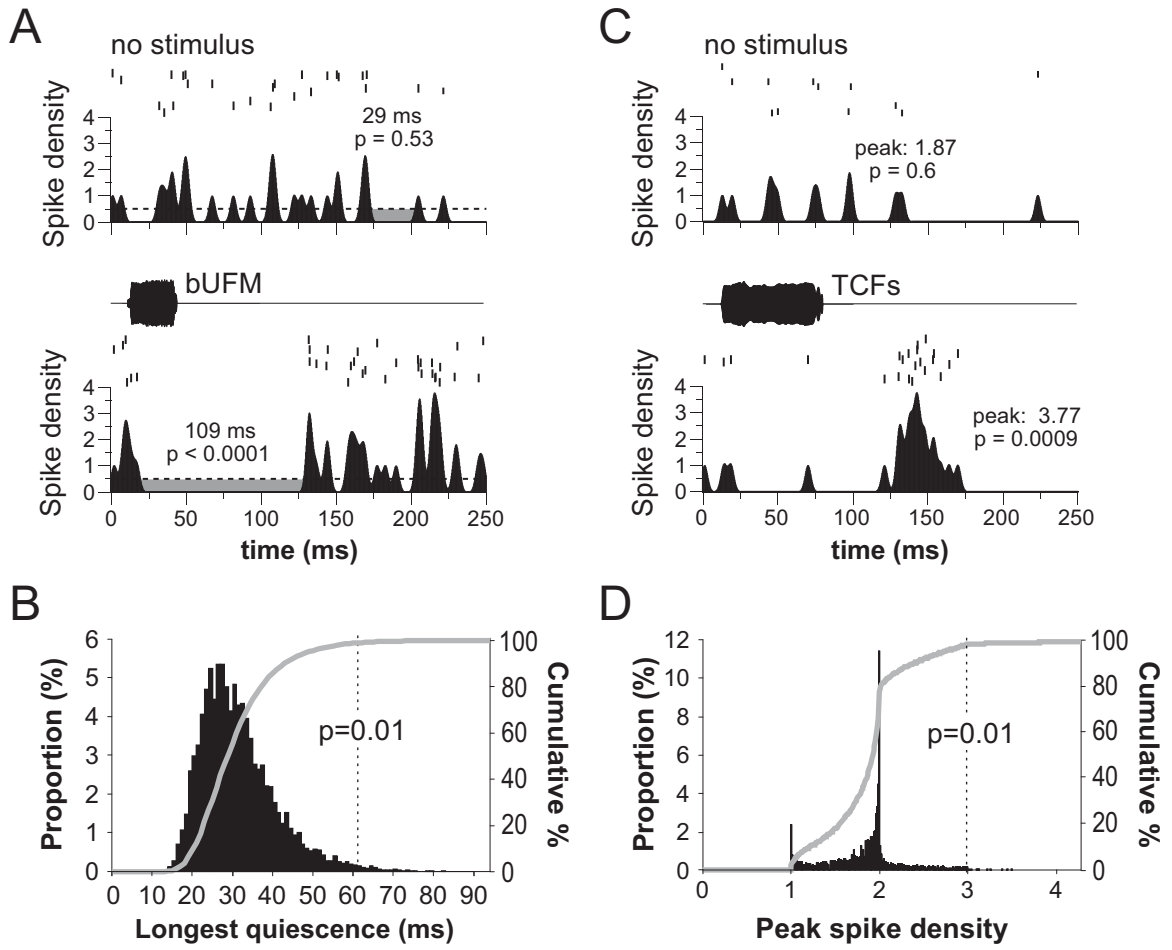

Supplement: supp_00580.2010_figS3.pdf [file supp_00580.2010_figS3.pdf]
